# Supplementary material for: Using hysteresis to predict the charge recombination properties of perovskite solar cells
Source: Royal Society of Chemistry journal article supplement (doi:10.1039/d0ta12046d), 2021-01-01
Supplement: d0ta12046d1.pdf [file d0ta12046d1.pdf]

# Supporting information

## Using Hysteresis to Predict charge Recombination Properties of Perovskite Solar Cells

Jionghua Wu<sup>1,2</sup>, Yusheng Li<sup>1</sup>, Yiming Li<sup>1</sup>, Weihao Xie<sup>2</sup>, Jiangjian Shi<sup>1</sup>, Dongmei Li<sup>1</sup>, Shuying Cheng<sup>2\*</sup>, Qingbo Meng<sup>1\*</sup>,

1. Key Laboratory for Renewable Energy, Chinese Academy of Sciences (CAS), Beijing Key Laboratory for New Energy Materials and Devices, Beijing National Laboratory for Condensed Matter Physics, Institute of Physics, Beijing 100190, China
2. College of Physics and Information Engineering, Institute of Micro-Nano Devices and Solar Cells, Fuzhou University, Fuzhou, 350108, P. R. China.

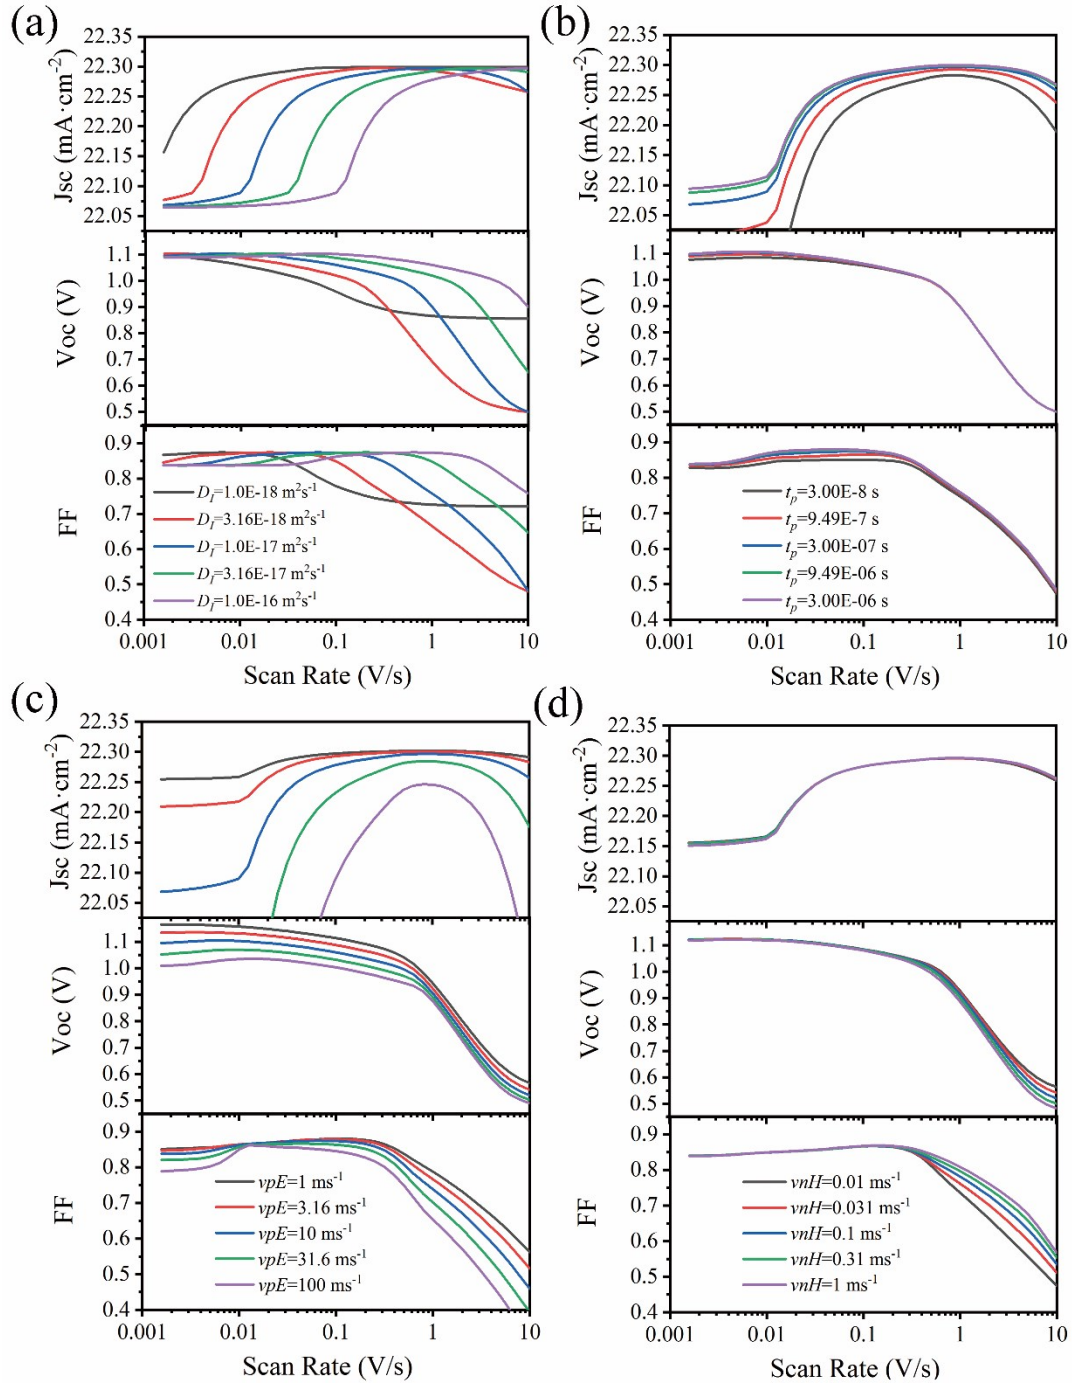

Figure S1 Simulated PSC performance under different scanning rates with different characteristics (a)  $D_f$  values (b)  $t_p$  values (c)  $vpE$  values (d)  $vnH$  values.

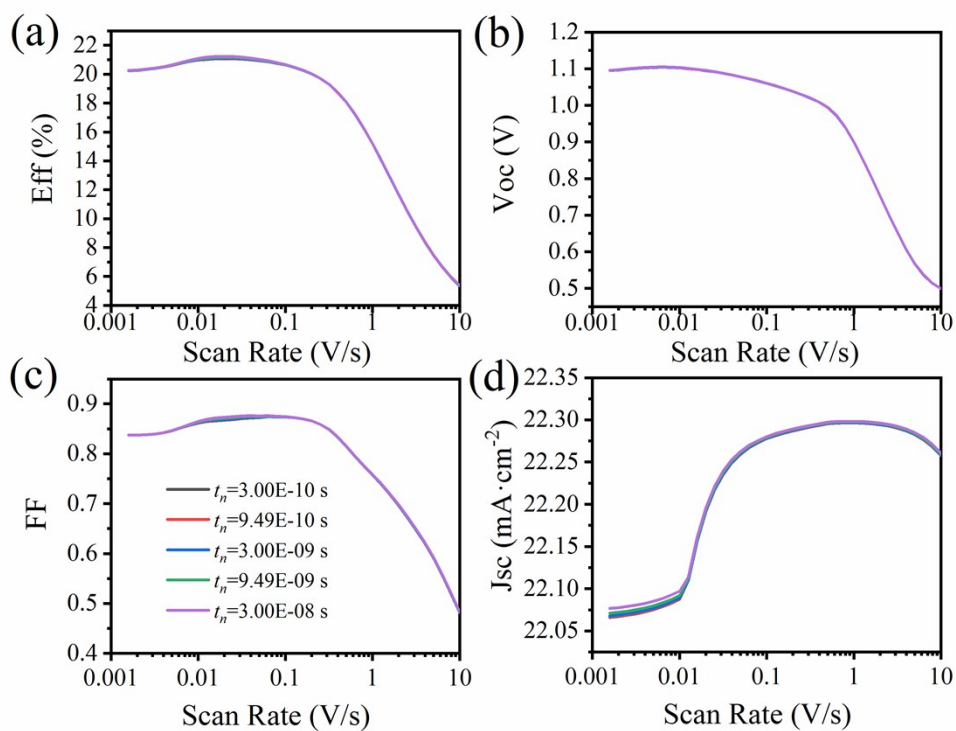

Figure S2. Simulated PSC performance under different scanning rates with different  $t_n$  values (a) efficiency (b) Voc (c) FF (d) Jsc

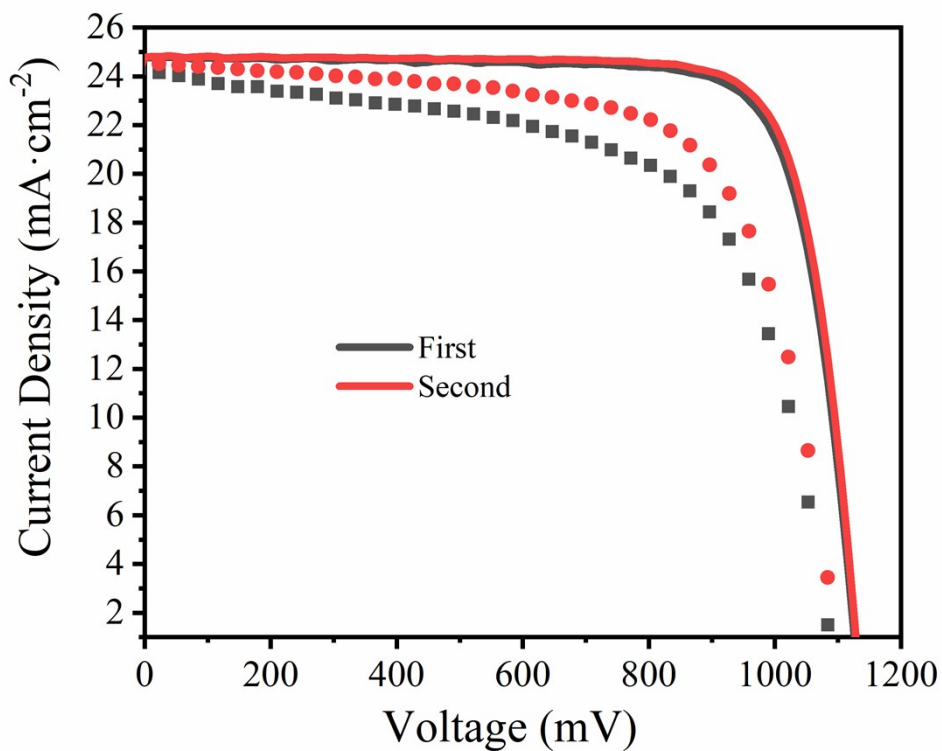

Figure S3. Two consecutive IV test results of the same PSC.

Table S1. Two consecutive IV test results of the same PSC.

|        | $J_{sc}$<br>(mA cm <sup>-2</sup> ) | $V_{oc}$<br>(V) | FF   | B-PCE<br>(%) | F-PCE<br>(%) |
|--------|------------------------------------|-----------------|------|--------------|--------------|
| First  | 24.76                              | 1.13            | 0.79 | 22.10        | 16.69        |
| Second | 24.75                              | 1.13            | 0.80 | 22.37        | 14.48        |

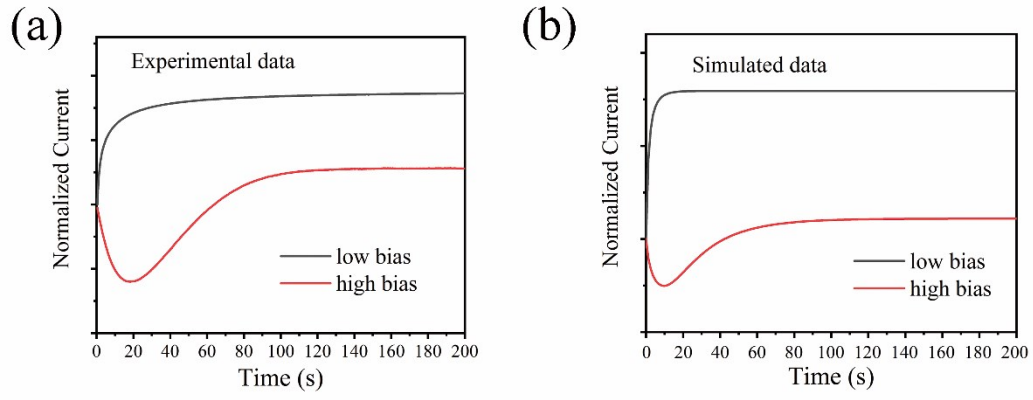

Figure S4. Unique IT curves of PSCs (a) experimental data. (b) Simulated data.

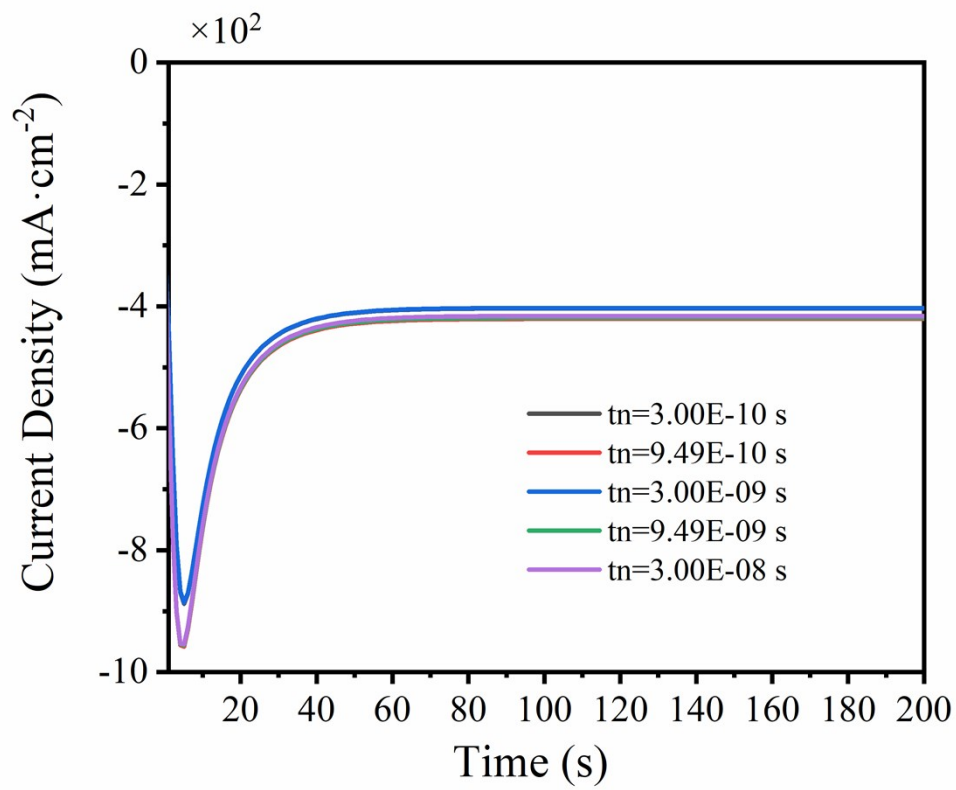

Figure S5. Simulated IT curve with different  $t_n$  values.

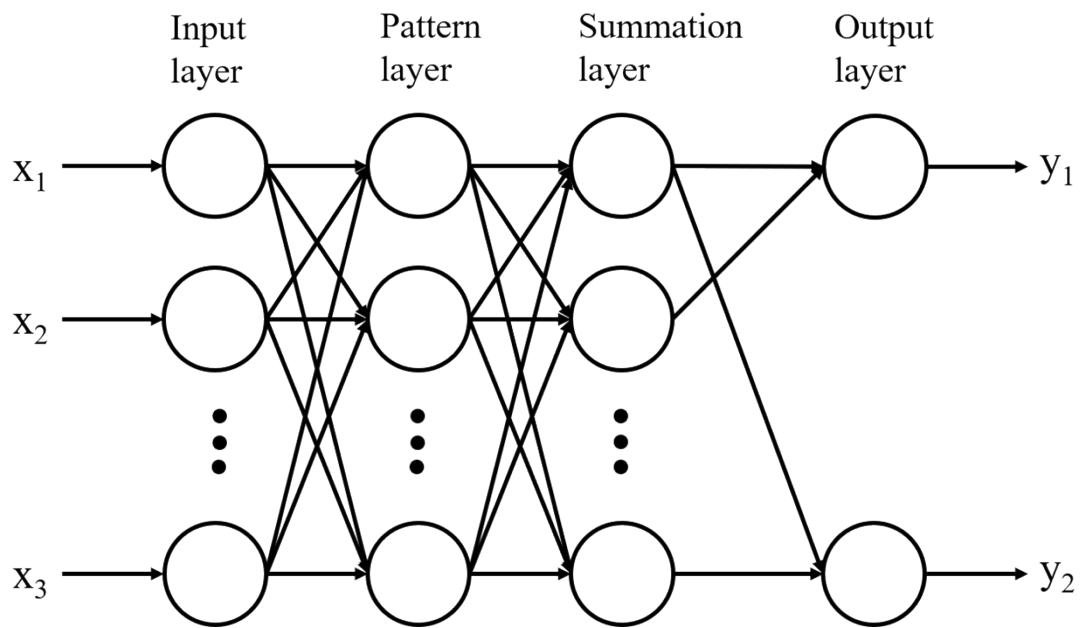

Figure S6. Structure diagram of generalized regression neural network

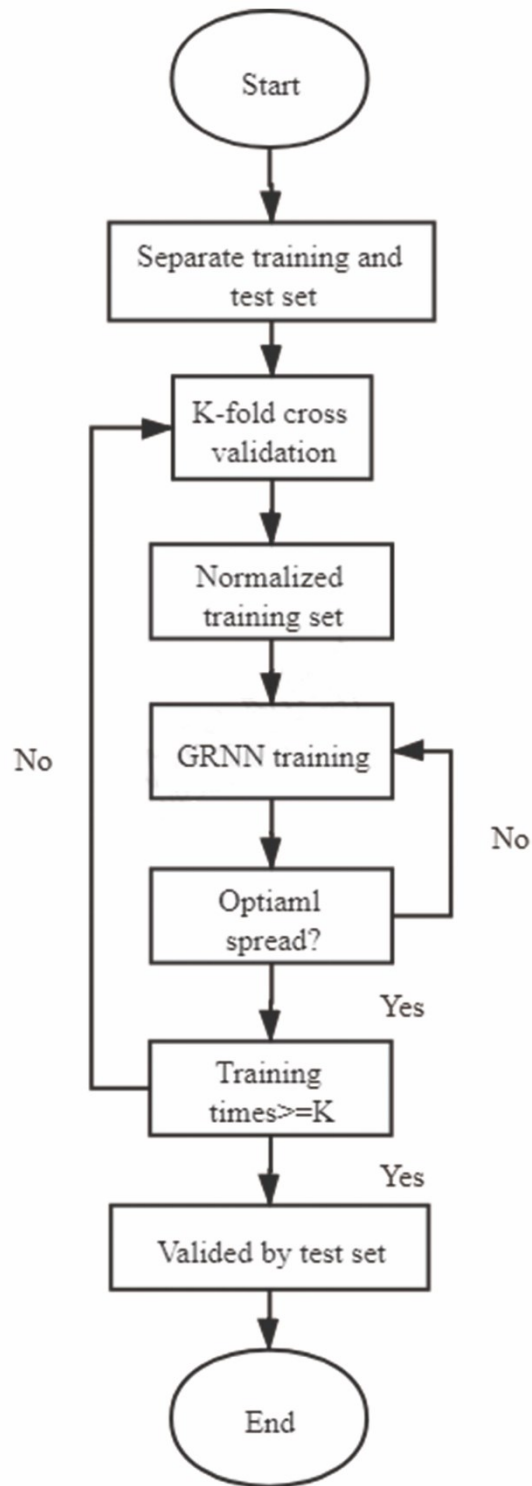

Figure S7. Flow diagram of the GRNN training.



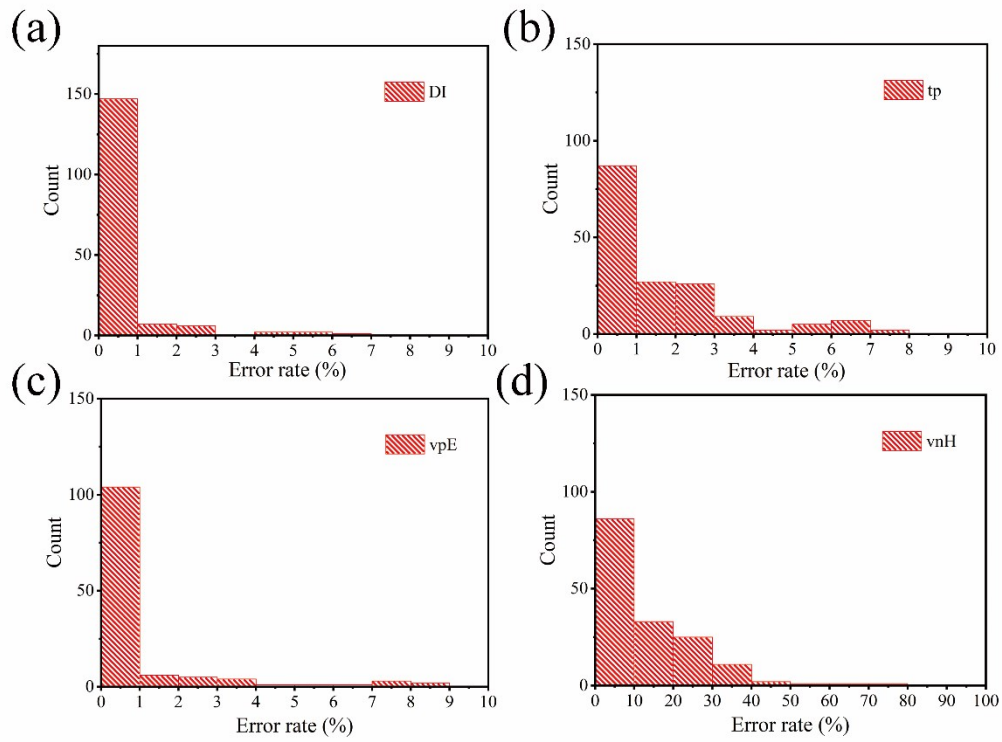

Figure S8. Error rate statistical data and distributions of validation results of different IT curves predicting device values through GNRR (a)  $D_I$ . (b)  $t_p$ . (c)  $vpE$ . (d)  $vnH$ .

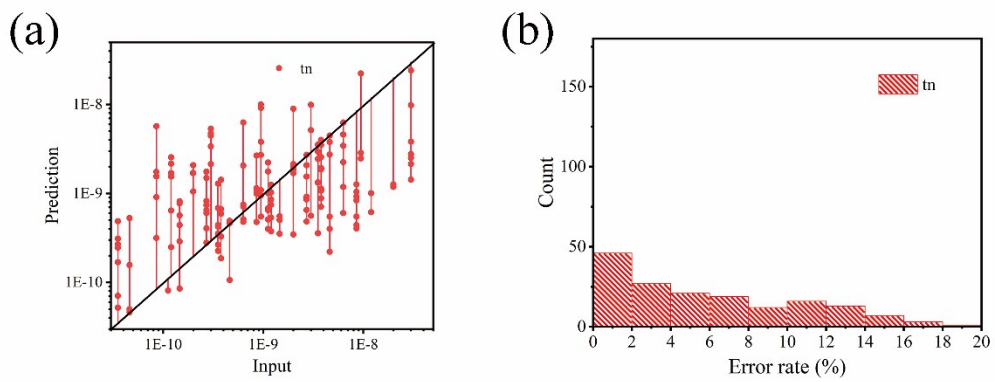

Figure S9. GRNN validation result and error rate of  $t_n$ .

Table S2. Device IV performance of four really PSCs.

|          | Jsc(mA/cm <sup>2</sup> ) | Voc(V)   | FF    | B-PCE(%) | F-PCE(%) |
|----------|--------------------------|----------|-------|----------|----------|
| Device A | 24.506                   | 1073.148 | 0.787 | 20.691   | 15.403   |
| Device B | 24.351                   | 1121.122 | 0.794 | 21.687   | 18.331   |
| Device C | 24.495                   | 1079.548 | 0.787 | 20.816   | 16.943   |
| Device D | 24.291                   | 1102.309 | 0.788 | 21.088   | 14.735   |

## Method of defect state separation

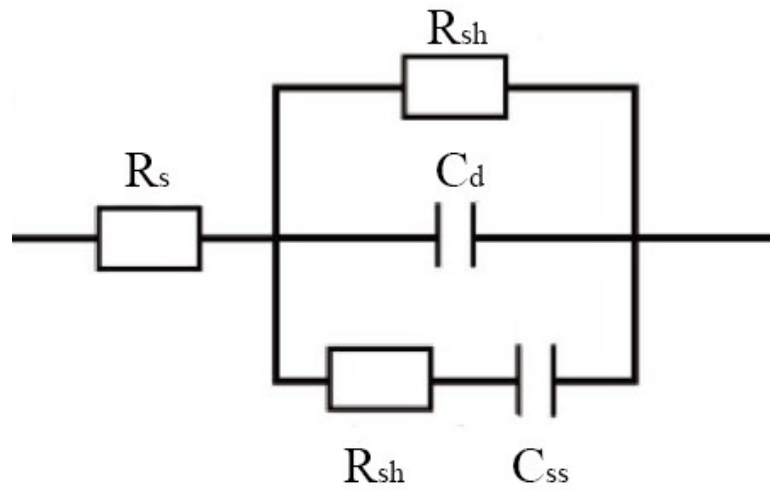

Figure S10. An expanded equivalent circuit model describing the charge transfer and recombination properties of the cell. The bulk and interface defects are reflected by the capacitance  $C_d$  and  $C_{SS}$ , respectively

Figure S10 shows an expanded equivalent circuit model separating interface-related capacitance bulk-related capacitance of the PSCs. This model is simplified from a much more complicated strategy that was initially utilized for a metal–insulator–semiconductor structure. [1,2]. In a common equivalent circuit model, charge transfer resistance ( $R_{sh}$ ) and bulk junction capacitance ( $C_d$ ) are paralleled element. The bulk defect density ( $N_b$ ) can be gotten as follow:

$$N_b = -A \frac{\omega C_d(\omega)}{\omega}$$

where  $\omega$  is the angular frequency and  $A$  is the constant related to the PSCs. Besides a widely used paralleled element consisting of  $R_{sh}$  and  $C_d$ , another capacitance ( $C_{SS}$ ) is used to reflect the interface defect response in the expanded equivalent circuit model. The  $R_{SS}$  is the resistance that a charge needs before being captured by the interface defect.[3] There is a quantitative relationship between  $C_{SS}$  and the interface defect density ( $N_{SS}$ ), that is [4]

$$C_{SS} = qSN_{SS}$$

where  $q$  is the electron charge and  $S$  is the device area. The  $C_{SS}$  can be gotten from following equation

$$\frac{1}{\omega} \left( G - \frac{1}{R_{sh}} \right) = \frac{\omega R_{SS} C_{SS}^2}{1 + (\omega R_{SS} C_{SS})^2}$$

where  $G$  is the admittance and  $\omega$  is the angular frequency. The left term of Equation can be obtained from experimental admittance measurements. The  $C_{SS}$  as well as the  $N_{SS}$  can then be computed from the admittance spectra.

#### Reference:

- [1] E. H. Nicollian, A. Goetzberger, *Bell Syst. Tech. J.* **1967**, *46*, 1055.
- [2] V. V. Brus, *Semicond. Sci. Technol.* **2012**, *27*, 035024.
- [3] K. Lehovec, A. Slobodskoy, *Solid-State Electron.* **1964**, *7*, 59.
- [4] S. M. Sze, K. N. G. Kwok, *Physics of Semiconductor Devices*, 3rd ed., Wiley, Hoboken **2007**.
